# Supplementary material for: Comparative analysis of plastid genomes of non-photosynthetic Ericaceae and their photosynthetic relatives
Source: PubMed Central journal article supplement (PMC4958920; doi:10.1038/srep30042), 2016-07-25
Supplement: srep30042-s1.pdf [file srep30042-s1.pdf]

Manuscript title: **Comparative analysis of plastid genomes of non-photosynthetic Ericaceae and their photosynthetic relatives**

Authors: Maria D. Logacheva, Mikhail I. Schelkunov, Viktoria Y. Shtratnikova, Maria V. Matveeva, Aleksey A. Penin

**Supplementary figures and tables.**

**Supplementary figure 1.**

Location of repeats in the plastid genomes of Ericaceae and two species from Ericales (*Actinidia chinensis* and *Camellia sinensis*). The dot-plot charts are built based on BLASTN self-alignment of the genomes. Detailed plots for regions that are particularly rich in repeats are shown in blue frames. Genomic positions are subscribed on the axes.

**Supplementary figure 2.**

Location of repeats within open reading frames containing an accD-like fragment. Dot-plots were built based on BLASTN self-alignments of respective sequences. Axes denote nucleotide positions within the open reading frames.

**Supplementary figure 3.**

Picture of a gel showing the expression of ORF357 in *Pyrola rotundifolia*. 1 – DNA ladder (0.1 – 1 Kb), 2 – empty, 3 – ORF357, 4 – no reverse transcriptase control, 5 – empty, 6 – petB, 7 – no reverse transcriptase control, 8 – empty, 9 – psaB, 10 – no reverse transcriptase control, 11 – empty, 12 - DNA ladder (0.1 – 1 Kb).

**Supplementary figure 4.**

Support of plastid genomes structure by mate-pair reads. The X-axis denotes a position in a plastid genome. The left Y-axis and a red line denote coverage by mate-pair inserts, i.e., how many mate-pairs reads there are in which the left read lies to the left of this position and the right one to the right of this position. The right Y-axis and a blue line denote the average insert length of such mate-pair reads over this position.

**Supplementary table 1.**

Fraction of repeats in Ericaceae plastomes.

**Supplementary table 2.**

Codon usage in plastid genomes of Ericaceae and *Camellia sinensis*.

**Supplementary table 3.**

Comparison of substitution rates in Ericaceae.

**Supplementary table 4.**

Sequence similarity for *accD* and *clpP* in Ericaceae.

**Supplementary table 5.**

Comparison of effect of an alignment tool on a selective pressure estimate for *accD* and *clpP*.

**Supplementary table 6.**

Characteristics of libraries, sequencing parameters and output.

**Supplementary note 1.**

Characteristics of the transcripts of *Hypopitys monotropa* with significant similarity to *accD* and *clpP* and sequences of contigs containing *clpP* and *accD* ORF.

Supplementary figure 1, whole genome dot plots.

*Monotropa uniflora*

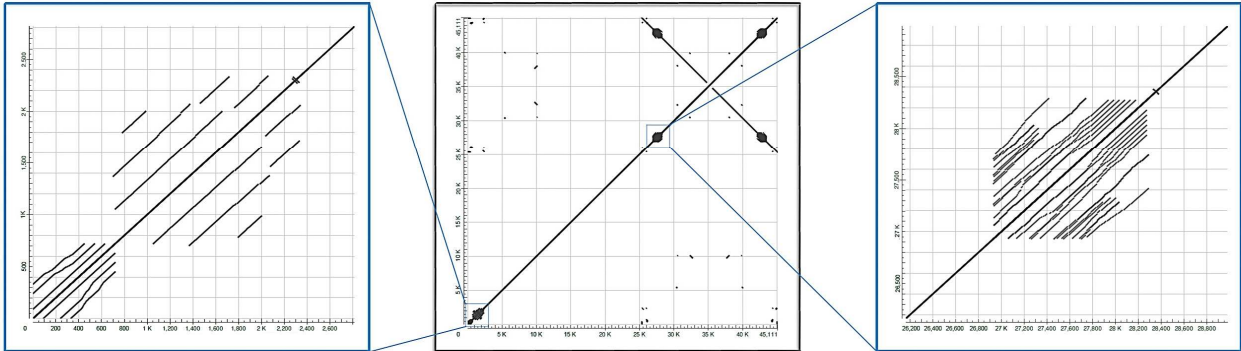

*Hypopitys monotropa*

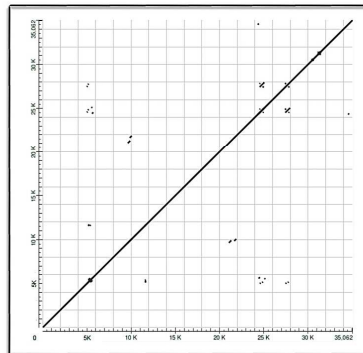

*Arbutus unedo*

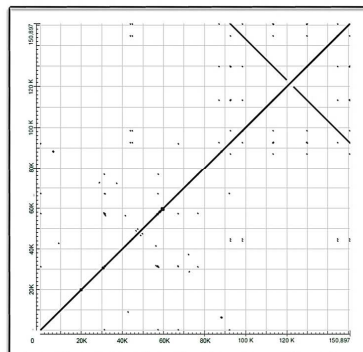

*Vaccinium macrocarpon*

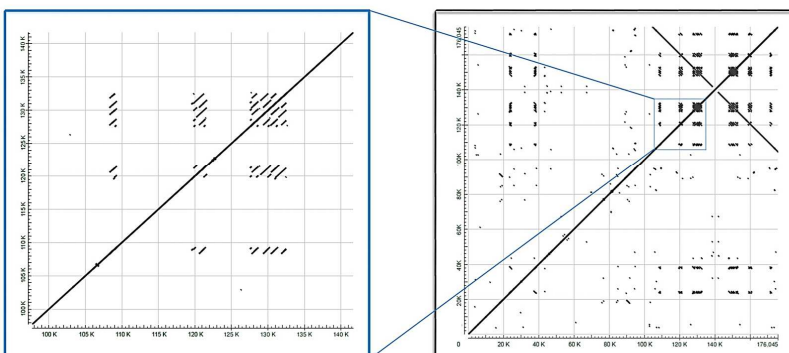

Supplementary figure 1, continued.

*Pyrola rotundifolia*

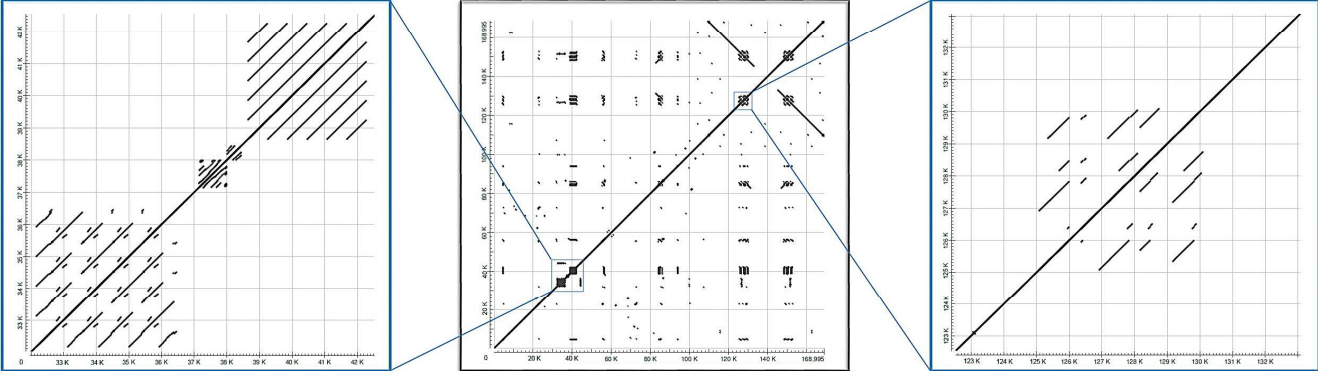

*Actinidia chinensis*

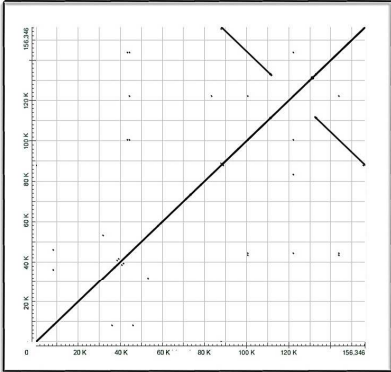

*Camellia sinensis*

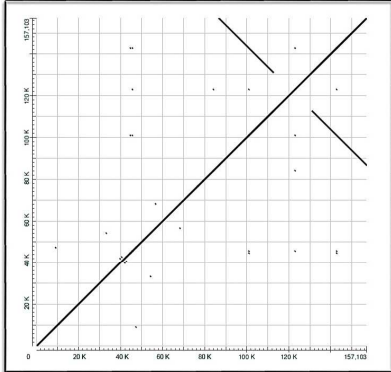

Supplementary figure 2, AccD dot plots.

*Monotropa uniflora*

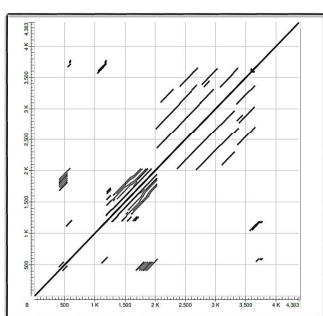

*Hypopitys monotropa*

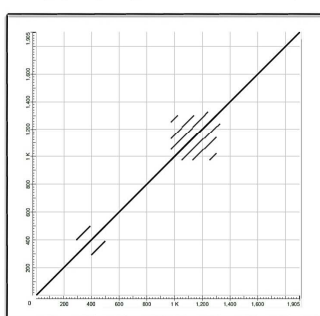

*Arbutus unedo*

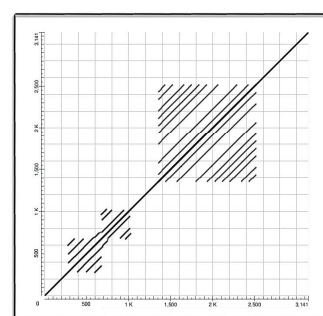

*Pyrola rotundifolia*

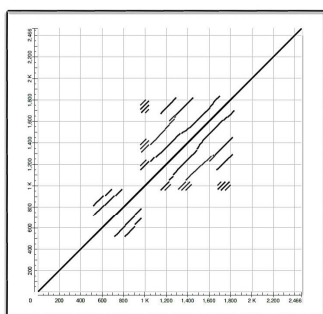

*Actinidia chinensis*

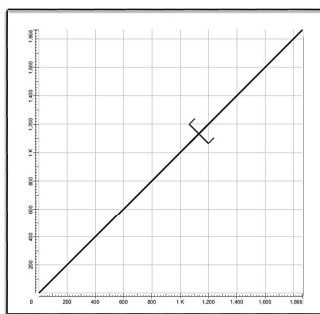

*Camellia sinensis*

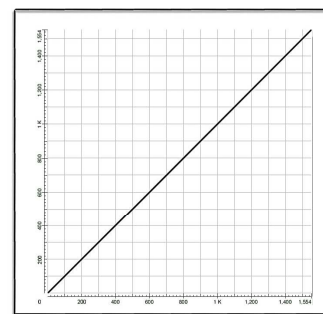

Supplementary figure 3. Picture of a gel showing the expression of ORF357 in *Pyrola rotundifolia*.  
1 – DNA ladder (0.1 – 1 Kb), 2 – empty, 3 – ORF357, 4 – no reverse transcriptase control, 5 – empty, 6 – petB, 7 – no reverse transcriptase control, 8 – empty, 9 – psaB, 10 – no reverse transcriptase control, 11 – empty, 12 - DNA ladder (0.1 – 1 Kb).

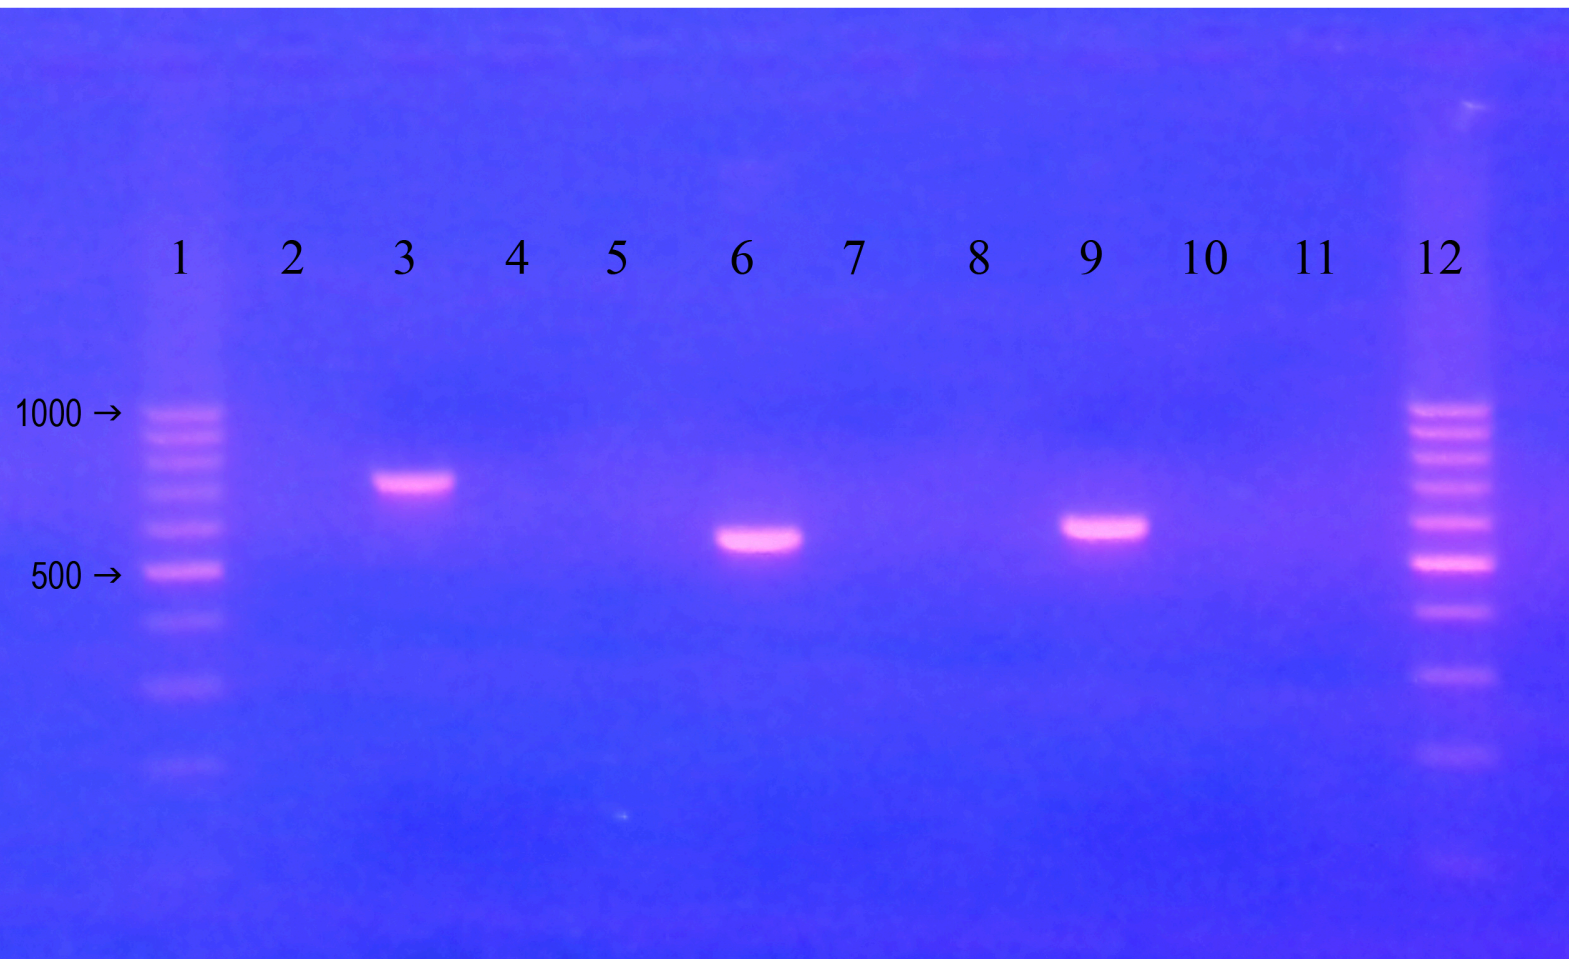

Supplementary figure 4. Support of plastid genomes structure by mate-pairs reads.

*Monotropa uniflora*

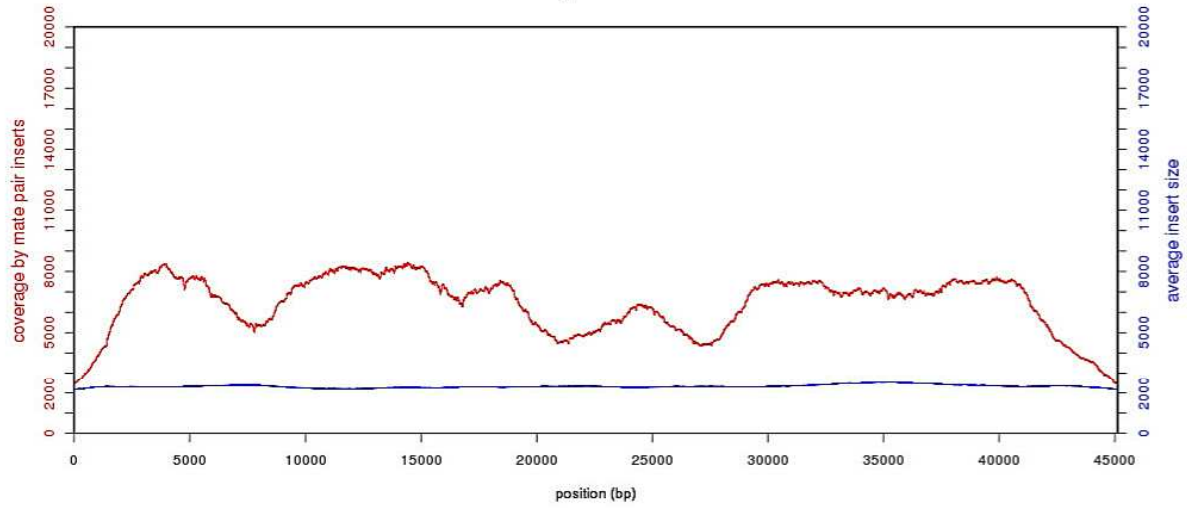

*Hypopitys monotropa*

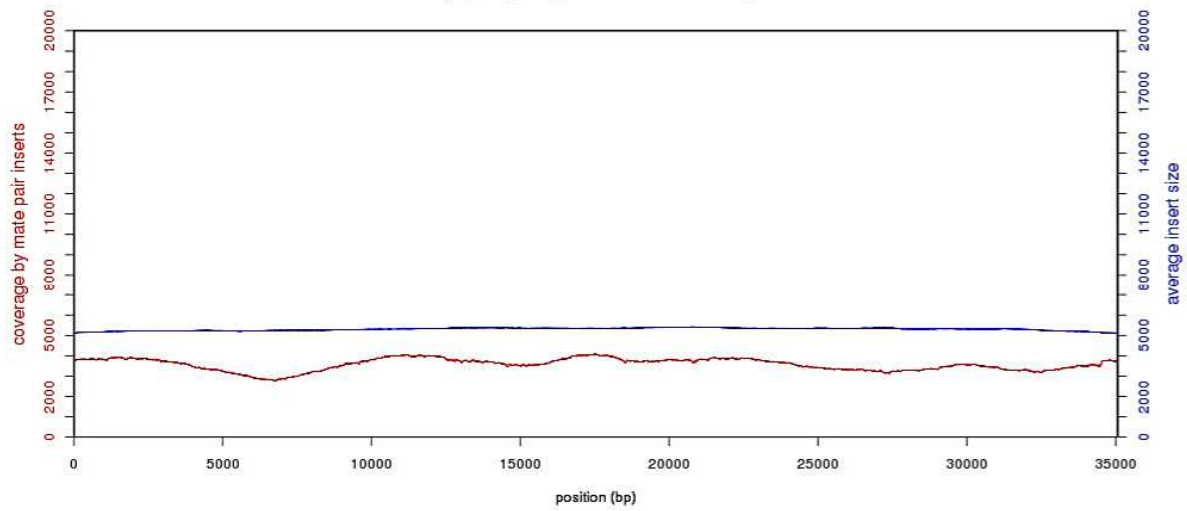

*Pyrola rotundifolia*

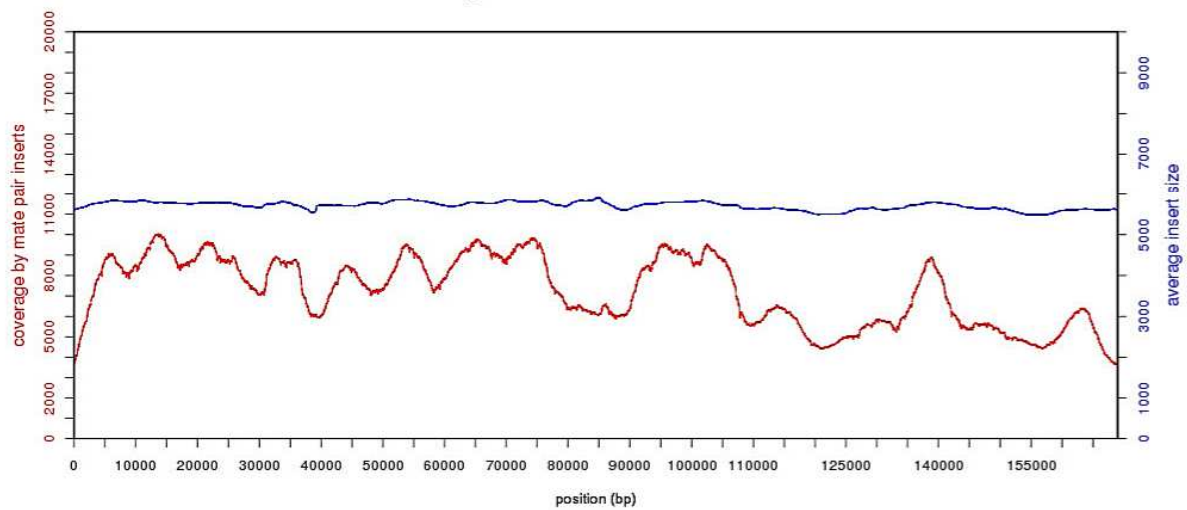

Supplementary table 1. Repeats in plastid genomes of Ericaceae  
The table describes amount of repeats of different length in plastid genomes of Ericaceae. Numbers in parentheses denote numbers of such repeats per 1 kbp of genome

| Species    | <i>Monotropa uniflora</i> |                   | <i>Hypopitys monotropa</i> |                  | <i>Pyrola rotundifolia</i> |                   | <i>Vaccinium macrocarpon</i> |                   | <i>Arbutus unedo</i> |                   | <i>Camellia sinensis</i> |                   | <i>Arabidopsis thaliana</i> |                   |
|------------|---------------------------|-------------------|----------------------------|------------------|----------------------------|-------------------|------------------------------|-------------------|----------------------|-------------------|--------------------------|-------------------|-----------------------------|-------------------|
|            | direct                    | reverse           | direct                     | reverse          | direct                     | reverse           | direct                       | reverse           | direct               | reverse           | direct                   | reverse           | direct                      | reverse           |
| 20-50 bp   | <b>21</b> (0.590)         | <b>20</b> (0.562) | <b>13</b> (0.371)          | <b>6</b> (0.171) | <b>61</b> (0.421)          | <b>54</b> (0.372) | <b>50</b> (0.353)            | <b>51</b> (0.360) | <b>16</b> (0.130)    | <b>20</b> (0.162) | <b>24</b> (0.183)        | <b>21</b> (0.160) | <b>51</b> (0.398)           | <b>49</b> (0.382) |
| 51-100 bp  | <b>1</b> (0.028)          | <b>0</b> (0.000)  | <b>8</b> (0.228)           | <b>0</b> (0.000) | <b>3</b> (0.021)           | <b>9</b> (0.062)  | <b>10</b> (0.071)            | <b>2</b> (0.014)  | <b>3</b> (0.024)     | <b>2</b> (0.016)  | <b>0</b> (0.000)         | <b>0</b> (0.000)  | <b>0</b> (0.000)            | <b>0</b> (0.000)  |
| 101-500 bp | <b>0</b> (0.000)          | <b>1</b> (0.028)  | <b>4</b> (0.114)           | <b>0</b> (0.000) | <b>18</b> (0.124)          | <b>23</b> (0.159) | <b>9</b> (0.063)             | <b>3</b> (0.021)  | <b>5</b> (0.041)     | <b>6</b> (0.049)  | <b>0</b> (0.000)         | <b>0</b> (0.000)  | <b>0</b> (0.000)            | <b>0</b> (0.000)  |
| >501 bp    | <b>0</b> (0.000)          | <b>0</b> (0.000)  | <b>0</b> (0.000)           | <b>0</b> (0.000) | <b>15</b> (0.103)          | <b>10</b> (0.069) | <b>3</b> (0.021)             | <b>2</b> (0.014)  | <b>0</b> (0.000)     | <b>1</b> (0.008)  | <b>0</b> (0.000)         | <b>0</b> (0.000)  | <b>0</b> (0.000)            | <b>0</b> (0.000)  |



| Supplementary table 2 - codon usage in plastid genomes of Ericaceae and <i>Camellia sinensis</i>                                                                                                                              |     |                            |                           |                            |                              |                      |                          |
|-------------------------------------------------------------------------------------------------------------------------------------------------------------------------------------------------------------------------------|-----|----------------------------|---------------------------|----------------------------|------------------------------|----------------------|--------------------------|
| The three numbers denote, respectively, 1.usage of this codon among all codons of this amino acid (in percents) 2.number of such codons per 1000 codons in a genome 3.total number of such codons among all genes of a genome |     |                            |                           |                            |                              |                      |                          |
|                                                                                                                                                                                                                               |     | <i>Hypopitys monotropa</i> | <i>Monotropa uniflora</i> | <i>Pyrola rotundifolia</i> | <i>Vaccinium macrocarpon</i> | <i>Arbutus unedo</i> | <i>Camellia sinensis</i> |
| Phe                                                                                                                                                                                                                           | UUU | 79 (28, 68)                | 90 (38, 92)               | 75 (28, 67)                | 70 (26, 64)                  | 67 (24, 57)          | 70 (26, 63)              |
|                                                                                                                                                                                                                               | UUC | 21 (7, 18)                 | 10 (4, 10)                | 25 (9, 22)                 | 30 (11, 28)                  | 33 (12, 28)          | 30 (11, 27)              |
| Leu                                                                                                                                                                                                                           | CUA | 11 (10, 25)                | 12 (12, 29)               | 13 (12, 29)                | 15 (14, 34)                  | 14 (13, 31)          | 13 (11, 27)              |
|                                                                                                                                                                                                                               | CUG | 4 (4, 10)                  | 3 (3, 7)                  | 5 (4, 10)                  | 6 (6, 14)                    | 4 (4, 10)            | 6 (5, 13)                |
|                                                                                                                                                                                                                               | UUG | 25 (24, 57)                | 13 (13, 31)               | 21 (19, 47)                | 24 (22, 53)                  | 21 (20, 48)          | 24 (21, 51)              |
|                                                                                                                                                                                                                               | CUC | 5 (5, 12)                  | 4 (4, 9)                  | 6 (6, 14)                  | 4 (3, 8)                     | 5 (5, 12)            | 5 (5, 11)                |
|                                                                                                                                                                                                                               | CUU | 18 (17, 42)                | 13 (12, 30)               | 19 (17, 42)                | 18 (17, 41)                  | 21 (20, 48)          | 19 (17, 41)              |
|                                                                                                                                                                                                                               | UUA | 37 (35, 85)                | 55 (54, 130)              | 35 (32, 78)                | 33 (30, 73)                  | 33 (31, 75)          | 32 (28, 68)              |
| Ile                                                                                                                                                                                                                           | AUU | 49 (46, 111)               | 51 (62, 149)              | 49 (45, 109)               | 48 (41, 99)                  | 49 (41, 100)         | 46 (43, 103)             |
|                                                                                                                                                                                                                               | AUA | 37 (35, 84)                | 39 (47, 113)              | 37 (34, 82)                | 37 (32, 77)                  | 34 (29, 69)          | 34 (31, 75)              |
|                                                                                                                                                                                                                               | AUC | 13 (12, 30)                | 10 (12, 28)               | 15 (14, 33)                | 15 (13, 31)                  | 17 (14, 34)          | 20 (18, 44)              |
| Met                                                                                                                                                                                                                           | AUG | 100 (22, 54)               | 100 (19, 45)              | 100 (24, 59)               | 100 (21, 51)                 | 100 (25, 60)         | 100 (25, 59)             |
| Val                                                                                                                                                                                                                           | GUC | 11 (5, 13)                 | 4 (2, 4)                  | 15 (7, 17)                 | 13 (7, 17)                   | 18 (10, 23)          | 9 (5, 12)                |
|                                                                                                                                                                                                                               | GUU | 39 (19, 45)                | 47 (20, 48)               | 38 (18, 44)                | 39 (21, 52)                  | 34 (18, 43)          | 43 (23, 54)              |
|                                                                                                                                                                                                                               | GUA | 37 (18, 43)                | 38 (16, 39)               | 32 (16, 38)                | 32 (17, 42)                  | 31 (17, 40)          | 33 (18, 42)              |
|                                                                                                                                                                                                                               | GUG | 13 (6, 15)                 | 12 (5, 12)                | 15 (7, 18)                 | 17 (9, 22)                   | 17 (9, 22)           | 15 (8, 19)               |
| Ser                                                                                                                                                                                                                           | AGC | 8 (5, 12)                  | 3 (2, 4)                  | 5 (3, 8)                   | 9 (6, 14)                    | 5 (3, 8)             | 4 (3, 6)                 |
|                                                                                                                                                                                                                               | UCG | 6 (3, 8)                   | 6 (4, 9)                  | 11 (7, 17)                 | 8 (5, 13)                    | 8 (5, 13)            | 9 (6, 15)                |
|                                                                                                                                                                                                                               | UCA | 21 (12, 30)                | 29 (18, 43)               | 20 (13, 31)                | 19 (12, 29)                  | 18 (11, 27)          | 20 (13, 32)              |
|                                                                                                                                                                                                                               | UCU | 29 (17, 41)                | 27 (16, 39)               | 27 (18, 43)                | 33 (20, 50)                  | 33 (21, 51)          | 32 (22, 52)              |
|                                                                                                                                                                                                                               | UCC | 15 (9, 22)                 | 8 (5, 12)                 | 17 (11, 27)                | 12 (8, 19)                   | 18 (11, 27)          | 15 (10, 25)              |
|                                                                                                                                                                                                                               | AGU | 20 (12, 29)                | 27 (17, 40)               | 20 (13, 32)                | 18 (11, 28)                  | 18 (12, 28)          | 20 (13, 32)              |
| Pro                                                                                                                                                                                                                           | CCU | 39 (14, 33)                | 47 (15, 36)               | 41 (15, 37)                | 34 (13, 31)                  | 31 (12, 29)          | 34 (13, 31)              |
|                                                                                                                                                                                                                               | CCA | 33 (12, 28)                | 32 (10, 25)               | 30 (11, 27)                | 32 (12, 29)                  | 34 (13, 32)          | 34 (13, 31)              |
|                                                                                                                                                                                                                               | CCC | 19 (7, 16)                 | 14 (5, 11)                | 20 (7, 18)                 | 24 (9, 22)                   | 24 (9, 22)           | 22 (8, 20)               |
|                                                                                                                                                                                                                               | CCG | 8 (3, 7)                   | 6 (2, 5)                  | 10 (4, 9)                  | 9 (3, 8)                     | 11 (4, 10)           | 10 (4, 9)                |
| Thr                                                                                                                                                                                                                           | ACA | 29 (13, 32)                | 43 (18, 43)               | 34 (16, 40)                | 24 (12, 30)                  | 29 (14, 34)          | 32 (15, 36)              |
|                                                                                                                                                                                                                               | ACC | 25 (12, 28)                | 9 (4, 9)                  | 20 (9, 23)                 | 24 (12, 30)                  | 24 (12, 28)          | 22 (10, 24)              |
|                                                                                                                                                                                                                               | ACG | 10 (5, 11)                 | 5 (2, 5)                  | 8 (4, 9)                   | 16 (8, 20)                   | 10 (5, 12)           | 11 (5, 12)               |
|                                                                                                                                                                                                                               | ACU | 36 (17, 40)                | 44 (18, 44)               | 38 (18, 44)                | 36 (18, 45)                  | 36 (17, 42)          | 35 (16, 39)              |
| Ala                                                                                                                                                                                                                           | GCG | 10 (5, 12)                 | 6 (3, 7)                  | 8 (4, 10)                  | 9 (5, 12)                    | 9 (5, 12)            | 8 (5, 11)                |
|                                                                                                                                                                                                                               | GCC | 15 (8, 19)                 | 10 (5, 11)                | 17 (9, 22)                 | 10 (5, 13)                   | 13 (7, 18)           | 16 (9, 22)               |
|                                                                                                                                                                                                                               | GCA | 38 (20, 48)                | 39 (18, 43)               | 38 (21, 51)                | 43 (23, 55)                  | 40 (23, 55)          | 38 (21, 51)              |
|                                                                                                                                                                                                                               | GCU | 37 (20, 47)                | 45 (20, 49)               | 38 (21, 50)                | 38 (20, 49)                  | 38 (21, 51)          | 38 (21, 51)              |
| Tyr                                                                                                                                                                                                                           | UAU | 84 (32, 77)                | 88 (39, 95)               | 85 (29, 70)                | 86 (30, 73)                  | 85 (28, 68)          | 83 (27, 64)              |
|                                                                                                                                                                                                                               | UAC | 16 (6, 15)                 | 12 (5, 13)                | 15 (5, 12)                 | 14 (5, 12)                   | 15 (5, 12)           | 17 (5, 13)               |
| His                                                                                                                                                                                                                           | CAC | 13 (4, 9)                  | 9 (2, 6)                  | 15 (4, 9)                  | 17 (5, 11)                   | 17 (5, 11)           | 16 (5, 11)               |
|                                                                                                                                                                                                                               | CAU | 87 (25, 59)                | 91 (25, 60)               | 85 (21, 52)                | 83 (22, 53)                  | 83 (22, 54)          | 84 (25, 59)              |
| Gln                                                                                                                                                                                                                           | CAG | 14 (5, 12)                 | 13 (5, 11)                | 16 (6, 15)                 | 17 (7, 16)                   | 21 (8, 19)           | 18 (7, 17)               |
|                                                                                                                                                                                                                               | CAA | 86 (32, 76)                | 87 (31, 75)               | 84 (32, 78)                | 83 (32, 78)                  | 79 (30, 73)          | 82 (31, 75)              |
| Asn                                                                                                                                                                                                                           | AAC | 23 (12, 28)                | 14 (8, 19)                | 29 (16, 38)                | 28 (15, 36)                  | 30 (15, 36)          | 29 (14, 34)              |
|                                                                                                                                                                                                                               | AAU | 77 (39, 93)                | 86 (48, 115)              | 71 (39, 94)                | 72 (38, 94)                  | 70 (35, 84)          | 71 (35, 84)              |
| Lys                                                                                                                                                                                                                           | AAA | 83 (88, 211)               | 86 (106, 257)             | 81 (72, 176)               | 81 (72, 176)                 | 80 (67, 162)         | 83 (59, 142)             |
|                                                                                                                                                                                                                               | AAG | 17 (18, 44)                | 14 (17, 41)               | 19 (17, 41)                | 19 (17, 41)                  | 20 (17, 41)          | 17 (13, 30)              |
| Asp                                                                                                                                                                                                                           | GAC | 28 (9, 21)                 | 10 (2, 6)                 | 24 (7, 18)                 | 30 (8, 20)                   | 27 (8, 19)           | 30 (10, 23)              |
|                                                                                                                                                                                                                               | GAU | 72 (22, 53)                | 90 (24, 57)               | 76 (23, 56)                | 70 (19, 47)                  | 73 (22, 52)          | 70 (22, 53)              |
| Glu                                                                                                                                                                                                                           | GAA | 81 (30, 72)                | 87 (29, 71)               | 86 (32, 79)                | 76 (32, 78)                  | 80 (32, 76)          | 80 (37, 89)              |
|                                                                                                                                                                                                                               | GAG | 19 (7, 17)                 | 13 (5, 11)                | 14 (5, 13)                 | 24 (10, 24)                  | 20 (8, 19)           | 20 (9, 22)               |
| Cys                                                                                                                                                                                                                           | UGU | 81 (12, 30)                | 81 (11, 26)               | 97 (14, 33)                | 86 (12, 30)                  | 91 (13, 31)          | 94 (13, 30)              |
|                                                                                                                                                                                                                               | UGC | 19 (3, 7)                  | 19 (2, 6)                 | 3 (0, 1)                   | 14 (2, 5)                    | 9 (1, 3)             | 6 (1, 2)                 |
| Trp                                                                                                                                                                                                                           | UGG | 100 (10, 24)               | 100 (9, 22)               | 100 (9, 23)                | 100 (10, 25)                 | 100 (11, 26)         | 100 (11, 26)             |
| Arg                                                                                                                                                                                                                           | AGA | 29 (28, 68)                | 40 (31, 74)               | 36 (38, 93)                | 34 (36, 89)                  | 31 (34, 82)          | 33 (34, 82)              |
|                                                                                                                                                                                                                               | CGG | 7 (7, 17)                  | 4 (3, 8)                  | 3 (3, 8)                   | 6 (6, 15)                    | 4 (5, 11)            | 4 (4, 9)                 |
|                                                                                                                                                                                                                               | CGU | 20 (20, 48)                | 21 (16, 39)               | 24 (25, 61)                | 25 (27, 66)                  | 26 (28, 68)          | 24 (25, 59)              |
|                                                                                                                                                                                                                               | CGA | 26 (25, 60)                | 18 (14, 33)               | 27 (29, 70)                | 25 (27, 66)                  | 27 (29, 70)          | 26 (27, 64)              |
|                                                                                                                                                                                                                               | AGG | 13 (13, 31)                | 11 (9, 21)                | 5 (6, 14)                  | 6 (6, 15)                    | 7 (8, 19)            | 9 (9, 22)                |
|                                                                                                                                                                                                                               | CGC | 5 (5, 11)                  | 6 (5, 11)                 | 5 (5, 13)                  | 5 (6, 14)                    | 4 (5, 11)            | 4 (4, 10)                |
| Gly                                                                                                                                                                                                                           | GGC | 17 (11, 26)                | 7 (4, 9)                  | 8 (5, 13)                  | 8 (5, 12)                    | 9 (6, 15)            | 8 (6, 14)                |
|                                                                                                                                                                                                                               | GGU | 29 (18, 44)                | 38 (20, 48)               | 36 (23, 57)                | 35 (23, 55)                  | 33 (23, 55)          | 35 (25, 59)              |
|                                                                                                                                                                                                                               | GGG | 19 (12, 28)                | 7 (4, 9)                  | 14 (9, 22)                 | 18 (11, 28)                  | 18 (12, 30)          | 17 (12, 29)              |
|                                                                                                                                                                                                                               | GGA | 35 (22, 52)                | 48 (26, 62)               | 41 (27, 65)                | 39 (25, 61)                  | 39 (27, 65)          | 40 (29, 69)              |
| Total number of codons                                                                                                                                                                                                        |     | 2408                       | 2416                      | 2431                       | 2443                         | 2411                 | 2399                     |

| Supplementary table 3. Comparison of substitution rates in Ericaceae. |                                                                                                                                                          |
|-----------------------------------------------------------------------|----------------------------------------------------------------------------------------------------------------------------------------------------------|
| Species                                                               | Distance to the closest common ancestor of the five species (measured as an average number of substitutions per position in shared protein-coding genes) |
| <i>Monotropa uniflora</i>                                             | 0.320                                                                                                                                                    |
| <i>Hypopitys monotropa</i>                                            | 0.139                                                                                                                                                    |
| <i>Arbutus unedo</i>                                                  | 0.024                                                                                                                                                    |
| <i>Vaccinium macrocarpon</i>                                          | 0.08                                                                                                                                                     |
| <i>Pyrola rotundifolia</i>                                            | 0.057                                                                                                                                                    |

| Supplementary table 4 - divergence of <i>accD</i> and <i>clpP</i> in Ericaceae |                           |                            |                            |                              |
|--------------------------------------------------------------------------------|---------------------------|----------------------------|----------------------------|------------------------------|
| Divergence of <i>accD</i> in Ericaceae                                         |                           |                            |                            |                              |
| Amino acid sequence similarity                                                 |                           |                            |                            |                              |
|                                                                                | <i>Monotropa uniflora</i> | <i>Hypopitys monotropa</i> | <i>Pyrola rotundifolia</i> | <i>Arbutus unedo</i>         |
| <i>Monotropa uniflora</i>                                                      |                           | 0,228                      | 0,223                      | 0,242                        |
| <i>Hypopitys monotropa</i>                                                     | 0,228                     |                            | 0,296                      | 0,357                        |
| <i>Pyrola rotundifolia</i>                                                     | 0,223                     | 0,296                      |                            | 0,297                        |
| <i>Arbutus unedo</i>                                                           | 0,242                     | 0,357                      | 0,297                      |                              |
| Nucleotide sequence similarity                                                 |                           |                            |                            |                              |
|                                                                                | <i>Monotropa uniflora</i> | <i>Hypopitys monotropa</i> | <i>Pyrola rotundifolia</i> | <i>Arbutus unedo</i>         |
| <i>Monotropa uniflora</i>                                                      |                           | 0,343                      | 0,386                      | 0,415                        |
| <i>Hypopitys monotropa</i>                                                     | 0,343                     |                            | 0,432                      | 0,444                        |
| <i>Pyrola rotundifolia</i>                                                     | 0,386                     | 0,432                      |                            | 0,426                        |
| <i>Arbutus unedo</i>                                                           | 0,415                     | 0,444                      | 0,426                      |                              |
| Divergence of <i>clpP</i> in Ericaceae                                         |                           |                            |                            |                              |
| Amino acid sequence similarity                                                 |                           |                            |                            |                              |
|                                                                                | <i>Monotropa uniflora</i> | <i>Hypopitys monotropa</i> | <i>Pyrola rotundifolia</i> | <i>Vaccinium macrocarpon</i> |
| <i>Monotropa uniflora</i>                                                      |                           | 0,282                      | 0,2                        | 0,206                        |
| <i>Hypopitys monotropa</i>                                                     | 0,282                     |                            | 0,193                      | 0,247                        |
| <i>Pyrola rotundifolia</i>                                                     | 0,2                       | 0,193                      |                            | 0,24                         |
| <i>Vaccinium macrocarpon</i>                                                   | 0,206                     | 0,247                      | 0,24                       |                              |
| Nucleotide sequence similarity                                                 |                           |                            |                            |                              |
|                                                                                | <i>Monotropa uniflora</i> | <i>Hypopitys monotropa</i> | <i>Pyrola rotundifolia</i> | <i>Vaccinium macrocarpon</i> |
| <i>Monotropa uniflora</i>                                                      |                           | 0,431                      | 0,354                      | 0,345                        |
| <i>Hypopitys monotropa</i>                                                     | 0,431                     |                            | 0,312                      | 0,39                         |
| <i>Pyrola rotundifolia</i>                                                     | 0,354                     | 0,312                      |                            | 0,358                        |
| <i>Vaccinium macrocarpon</i>                                                   | 0,345                     | 0,39                       | 0,358                      |                              |

Supplementary table 5. Comparison of effect of an alignment tool on a selective pressure estimate for *accD* and *clpP*.

|                                   | Percent of codons under negative selection | Percent of codons evolving neutrally | Percent of codons under positive selection | P-value for presence of positive selection |
|-----------------------------------|--------------------------------------------|--------------------------------------|--------------------------------------------|--------------------------------------------|
| <b>accD</b>                       |                                            |                                      |                                            |                                            |
| PRANK in the codon alignment mode | 67%                                        | 32%                                  | 1%                                         | 0.13                                       |
| PRANK with TranslatorX            | 56%                                        | 41%                                  | 3%                                         | 0.087                                      |
| MUSCLE with TranslatorX           | 42%                                        | 47%                                  | 11%                                        | $2 \cdot 10^{-9}$                          |
| MAFFT with TranslatorX            | 55%                                        | 42%                                  | 3%                                         | $9 \cdot 10^{-4}$                          |
| ClustalW with TranslatorX         | 38%                                        | 30%                                  | 32%                                        | less than $10^{-16}$                       |
| T-coffee with TranslatorX         | 48%                                        | 47%                                  | 5%                                         | $2 \cdot 10^{-4}$                          |
| <b>clpP</b>                       |                                            |                                      |                                            |                                            |
| PRANK in the codon alignment mode | 37%                                        | 57%                                  | 6%                                         | 0.011                                      |
| PRANK with TranslatorX            | 43%                                        | 51%                                  | 6%                                         | 0.14                                       |
| MUSCLE with TranslatorX           | 36%                                        | 49%                                  | 15%                                        | 0.004                                      |
| MAFFT with TranslatorX            | 32%                                        | 61%                                  | 7%                                         | 0.03                                       |
| ClustalW with TranslatorX         | 32%                                        | 45%                                  | 23%                                        | $6 \cdot 10^{-6}$                          |
| T-coffee with TranslatorX         | 26%                                        | 50%                                  | 24%                                        | $5 \cdot 10^{-7}$                          |

Supplementary table 6. Characteristics of libraries, sequencing parameters and output.

| Species                    | mean insert length and insert length standard deviation, bp <sup>*</sup> | read length, bp | number of reads <sup>**</sup> | mean plastid genome coverage (minimum coverage, maximum coverage) |
|----------------------------|--------------------------------------------------------------------------|-----------------|-------------------------------|-------------------------------------------------------------------|
| <i>Hypopitys monotropa</i> | 486±35                                                                   | 2*251           | 5,814,486                     | 720 (219, 1404)                                                   |
|                            | 5158±885 ( mate-pairs libraries)                                         | 2*251           | 6,889,666                     |                                                                   |
|                            | 8705±2537 ( mate-pairs libraries)                                        | 2*151           | 7,143,258                     |                                                                   |
| <i>Monotropa uniflora</i>  | 301±62                                                                   | 2*101           | 111,913,428                   | 2274 (1115, 4149)                                                 |
|                            | 457±40                                                                   | 2*251           | 1,542,300                     |                                                                   |
|                            | 2205±325 (mate-pairs libraries)                                          | 2*101           | 9,340,990                     |                                                                   |
| <i>Pyrola rotundifolia</i> | 459±63                                                                   | 2*300           | 4,703,724                     | 442 (25, 1408)                                                    |
|                            | 547±109                                                                  | 2*300           | 2,246,208                     |                                                                   |
|                            | 5630±1026 ( mate-pairs libraries)                                        | 2*101           | 4,140,794                     |                                                                   |
|                            | 5630±1026 (the same library)                                             | 2*220           | 16,687,564                    |                                                                   |
|                            | 5630±1026 (the same library)                                             | 2*301           | 3,504,218                     |                                                                   |

\* - Estimated by mapping reads to the plastomes

\*\* - A read pair counts as two reads. For mate-pairs libraries only properly paired reads count (so-called groups A, B, C in NextClip terms).

**Supplementary note 1.**

Characteristics of the transcripts of *Hypopitys monotropa* with significant similarity to *accD* and *clpP* and sequences of contigs containing *clpP* and *accD* ORF (ORF are marked by asterisks and sequences are italicized).

**accD**

| Contig name  | Length | E-value of a BLASTN match between the <i>Hypopitys</i> ' plastid <i>accD</i> and this transcript. | FPKM  | Matching region in the plastome                                                                                                                                                                                         | Commentary                                                                                                                                                                                                                                                                   |
|--------------|--------|---------------------------------------------------------------------------------------------------|-------|-------------------------------------------------------------------------------------------------------------------------------------------------------------------------------------------------------------------------|------------------------------------------------------------------------------------------------------------------------------------------------------------------------------------------------------------------------------------------------------------------------------|
| c36330_g1_i5 | 3577   | 0.0                                                                                               | 33.73 | BLASTN alignment to the plastome indicates that this transcript matches to a region with coordinates from 27,598 to 31,174. There are no mismatches with the plastome sequence.                                         | Includes <i>clpP</i> and a part of <i>accD</i> gene                                                                                                                                                                                                                          |
| c36330_g1_i7 | 3594   | 0.0                                                                                               | 0     | BLASTN alignment to the plastome indicates that this transcript matches to a region with coordinates from 27,598 to 31,174. The only difference is an insertion of 17 base pairs, that falls into an intergenic region. | Includes <i>clpP</i> and a part of <i>accD</i> gene. Seems to be a rare form of the main isoform c36330_g1_i5.                                                                                                                                                               |
| c37588_g2_i1 | 1230   | 0.0                                                                                               | 32.89 | BLASTN alignment to the plastome indicates that this transcript matches to a region with coordinates from 31,405 to 32,634. Includes one single-nucleotide difference from the plastid genome within a tRNA gene.       | Includes a part of <i>accD</i> and three tRNA genes. Due to a similarity of FPKM with the FPKM of c36330_g1_i5, we suppose that this is a part of the same transcript. The inability of Trinity to assemble them as a whole may originate from, for example, an RNA editing. |

|               |     |                     |      |                                                                                                                                                                                                     |                                                                                                                                                                                                                                     |
|---------------|-----|---------------------|------|-----------------------------------------------------------------------------------------------------------------------------------------------------------------------------------------------------|-------------------------------------------------------------------------------------------------------------------------------------------------------------------------------------------------------------------------------------|
| c82722_g1_i1  | 269 | $10^{-26}$          | 3.12 | BLASTN alignment to the plastome indicates that this transcript matches to a region with coordinates from 31,061 to 31,188 with a sequence similarity of 80%. This is a region within <i>accD</i> . | We suppose, this is a pseudogene within the nuclear or the mitochondrial genomes. The best match of BLASTN alignment against NCBI NT with default parameters is within a plastid genome of <i>Actinidia chinensis</i> isolate AD-6  |
| c95803_g1_i1  | 122 | $2 \times 10^{-23}$ | 0    | BLASTN alignment to the plastome indicates that this transcript matches to a region with coordinates from 30,911 to 30,987 with a sequence similarity of 92%. This is a region within <i>accD</i> . | We suppose, this is a pseudogene within the nuclear or the mitochondrial genomes. The best match of BLASTN alignment against NCBI NT with default parameters is within a plastid genome of <i>Monotropa hypopitys</i> isolate 2KALR |
| c60384_g1_i1  | 294 | $3 \times 10^{-21}$ | 1.89 | BLASTN alignment to the plastome indicates that this transcript matches to a region with coordinates from 31,819-31,906 with a sequence similarity of 86%. This is a region within <i>accD</i> .    | We suppose, this is a pseudogene within the nuclear or the mitochondrial genomes. The best match of BLASTN alignment against NCBI NT with default parameters is within a plastid genome of <i>Monotropa hypopitys</i> isolate 2KALR |
| c136046_g1_i1 | 125 | $9 \times 10^{-15}$ | 0    | BLASTN alignment to the plastome indicates that this transcript matches to a region with coordinates from 30541-30601 with a sequence similarity of 90%. This is a region within <i>accD</i> .      | We suppose, this is a pseudogene within the nuclear or the mitochondrial genomes. The best match of BLASTN alignment against NCBI NT with default parameters is within a plastid genome of <i>Monotropa hypopitys</i> isolate 2KALR |

| c31896_g2_i1 | 1361   | $4 \times 10^{-6}$                                                                                | 88.38 | BLASTN alignment to the plastome returns a short match (35 bp) with a region from 31,852 to 31,886 bp. This is a region within <i>accD</i> .                                                                            | Alignment by BLASTN to NCBI NT indicates the closest match to <i>Vitis vinifera</i> 's clathrin gene with e-value $3 \times 10^{-128}$ and a similarity of 78%. This is, possibly, a transcript of <i>Hypopitys</i> ' clathrin, with a random coincidence of its short region to a short part of <i>accD</i> . |
|--------------|--------|---------------------------------------------------------------------------------------------------|-------|-------------------------------------------------------------------------------------------------------------------------------------------------------------------------------------------------------------------------|----------------------------------------------------------------------------------------------------------------------------------------------------------------------------------------------------------------------------------------------------------------------------------------------------------------|
| <b>clpP</b>  |        |                                                                                                   |       |                                                                                                                                                                                                                         |                                                                                                                                                                                                                                                                                                                |
| Contig name  | Length | E-value of a BLASTN match between the <i>Hypopitys</i> ' plastid <i>clpP</i> and this transcript. | FPKM  | Matching region in the plastome                                                                                                                                                                                         | Commentary                                                                                                                                                                                                                                                                                                     |
| c36330_g1_i5 | 3577   | 0.0                                                                                               | 33.73 | BLASTN alignment to the plastome indicates that this transcript matches to a region with coordinates from 27,598 to 31,174. There are no differences from the plastome sequence.                                        | Includes <i>clpP</i> and a part of <i>accD</i> gene.                                                                                                                                                                                                                                                           |
| c36330_g1_i7 | 3594   | 0.0                                                                                               | 0     | BLASTN alignment to the plastome indicates that this transcript matches to a region with coordinates from 27,598 to 31,174. The only difference is an insertion of 17 base pairs, that falls into an intergenic region. | Includes <i>clpP</i> and a part of <i>accD</i> gene                                                                                                                                                                                                                                                            |



|              |     |                     |      |                                                                                                                                                                                                     |                                                                                                                                                                                                                                                                                                                                                               |
|--------------|-----|---------------------|------|-----------------------------------------------------------------------------------------------------------------------------------------------------------------------------------------------------|---------------------------------------------------------------------------------------------------------------------------------------------------------------------------------------------------------------------------------------------------------------------------------------------------------------------------------------------------------------|
| c61870_g1_i1 | 367 | $7 \times 10^{-25}$ | 0.74 | BLASTN alignment to the plastome indicates that this transcript matches to a region with coordinates from 28,765 to 28,654 with a sequence similarity of 85%. This is a region within <i>clpP</i> . | We suppose, this is a pseudogene within the nuclear or the mitochondrial genomes. The best match of BLASTN alignment against NCBI NT with default parameters is within a plastid genome of <i>Monotropa hypopitys</i> isolate 1VOLR                                                                                                                           |
| c37530_g3_i1 | 233 | $3 \times 10^{-10}$ | 0    | BLASTN alignment to the plastome indicates that this transcript matches to a region with coordinates from 28,497 to 28,536 with a sequence similarity of 98%. This is a region within <i>clpP</i> . | We suppose, this is a pseudogene within the nuclear or the mitochondrial genomes. Although the similarity to the plastid <i>clpP</i> is high, the length of the matching subsequence is very short (40 bp). The best match of BLASTN alignment against NCBI NT with default parameters is within a plastid genome of <i>Monotropa hypopitys</i> isolate 1VOLR |
| c81526_g1_i1 | 150 | $10^{-8}$           | 0    | BLASTN alignment to the plastome indicates that this transcript matches to a region with coordinates from 28,787 to 28,536 with a sequence similarity of 74%. This is a region within <i>clpP</i> . | We suppose, this is a pseudogene within the nuclear or the mitochondrial genomes. The best match of BLASTN alignment against NCBI NT with default parameters is within a plastid genome of <i>Monotropa hypopitys</i> isolate 1VOLR                                                                                                                           |
| c67804_g1_i1 | 165 | $10^{-8}$           | 0    | BLASTN alignment to the plastome indicates that this transcript matches to a region with coordinates from 28,653 to 28,719 with a sequence similarity of 81%. This is a region within <i>clpP</i> . | We suppose, this is a pseudogene within the nuclear or the mitochondrial genomes. The best match of BLASTN alignment against NCBI NT with default parameters is within a plastid genome of <i>Monotropa hypopitys</i> isolate 1VOLR                                                                                                                           |

|              |     |                    |   |                                                                                                                                                                                                     |                                                                                                                                                                                                                                     |
|--------------|-----|--------------------|---|-----------------------------------------------------------------------------------------------------------------------------------------------------------------------------------------------------|-------------------------------------------------------------------------------------------------------------------------------------------------------------------------------------------------------------------------------------|
| c54708_g1_i1 | 238 | $5 \times 10^{-8}$ | 0 | BLASTN alignment to the plastome indicates that this transcript matches to a region with coordinates from 27,982 to 28,030 with a sequence similarity of 88%. This is a region within <i>clpP</i> . | We suppose, this is a pseudogene within the nuclear or the mitochondrial genomes. The best match of BLASTN alignment against NCBI NT with default parameters is within a plastid genome of <i>Monotropa hypopitys</i> isolate 1VOLR |
|--------------|-----|--------------------|---|-----------------------------------------------------------------------------------------------------------------------------------------------------------------------------------------------------|-------------------------------------------------------------------------------------------------------------------------------------------------------------------------------------------------------------------------------------|

>c36330\_g1\_i5 - includes *clpP* and a part of *accD*

GAGGCTCTTGCTCAGTCTTATCTTTTGCTTCTGCAGCAAGATGCTCTTGCTCAGCCTTCTC  
CCTTTCTTTTATAAGTTCTTTTAAGTTCTCGTGTATCTCCTCAATTATTTTCGTCTACCCAG  
CTCCATTTAACAAAATCAAAAGGCTTCACTTCTTTTTTATAATCAAATTCATGGGATCCAG  
AGAGAACATGTCCTCATCCATAGGAGACCAAGTGTCTGAATCAACCAAAAAGCCTATTCTA  
TCTGAACTATTCATTTGCACATGTGATTGGCACCATTACAAATATACAGTTTTGAATTA  
AAAAGCGATTTATAATTTATTCCATAACAACTTTTGCATTGAACCCACAAATGGCTATAATCGGG  
ATGACTCTTATTACTGCCCCTTTCATTGCTTTTTTTATCTGGATCTATTTTCGTTCTCCTG  
ATCTATTTTTTCTGTTGAAAAGGACCATTATCAGGACCATTATCAGGGTATATTATTTCTCT  
TTTATAATATTGCAAGCCGTCCTCTATTTTATTGAGCTTTTTATCTATCTCCTCGTCTTACTT  
TGATCTAATTCGTAAGTGTAGCTCACTTAATTTAATTTTATTCCCTAATCTCTCTATATCCAGG  
GTGTATTGGTCAAAATCCCCATCGATATCTCCCTGGTTCTCCTTTGATCTAATGCACGCTG  
TTGCTTTCTTTCTTTCAGTTGATTCCCTTGACCCCTCTAGATCTAGGATGCGTTGTTCTAAATC  
TTCTTTAAATCGATCGGTGTCTCTAAAGTAATTGATAACAACACTTAGATGTTCCGGATGCCA  
GTCCACGGGTTTTATTCTCTAGATCTACTATATCAAAATTTTTATCAAATTTTTTATGTTTCCT  
TCTATGATTATCCGACACAGACTCATCCCGCCTCTTGGCATTACCTAAATTTTTAAAATTAG  
AGGATATTTGTGTCTGCTTCAATTTACTAAGTTTGTAGCTCCAATAGCAAAAATACTGAAA  
GGAAC TACCCCTATATTGCCGATTAATTTTTTTATTTGCAT\*ACTATATACCTCAGGTGTA  
AAATATAATTTTTAATTAATAAAAATAAAAAGTATGGTAGATTCAAACGAGCGTTCTATC  
TAATCGTATGGTTAAGATTTAGTTTTCCCATACAATTAGTTTTCCCATACAATTAGTT  
TTCCCATACAATTAATTTAATAATTCGTCCGCATAAACTAAAATTTAATAATTTAATAGTAGA  
AAGAACCCTTTAAGAATGCGTCCACAGATAACCAAAAACCAGACAAGTCCGATATAA  
AATAAAAATTTAATAAAAATTTTACCAACCCTTTTAAAACCAGATTACTAAAGTC  
CAAAAAGATTTATCCATATAGGCTCTCCTAATTTAATTTTAAATTTAATAGTAGA  
AATAATAGTCTACTTCTACGTTTGACAACAACATGCCAGAGAAGATTGAATAAA  
GAAAGAATTAATAATATTGGAAATTTTTTTGTCAAATAGGCAAAATAGAATGG  
ATCTACTTTATCTATTTTGCAAGCGTGTCCATGGTTCGAGAATTACCCAAACTGCTATG  
TAATCTTTTACATTACACAGGACAAAGATAATAAGAATTCGCATTATTATGTCAACT  
TTCTTGCTCAACAGTTTGAATACTATAAACAGTGGAATATTAAGGAAAAAAGTAATC  
ATATAGATTCTATAGAAATATCCTACTTGATCCGTGTTGATAGGGTTAACTTTTTTAA  
GATATAAAAATAAAAACAATAATAAGAGACTTGAACAAGTCCTTAATATTCCAGTGG  
TTAAAGGTAAAAATTAACGAACCTCTCTTATAAAAATCTTTGAGTTTTATAGTCA  
AATTTATGAGTATAGAAGTCGTCTGGTTCTGTGTCCACAAACAACCAAGCCATACA  
AAATTGACTAAACAAGTAATCAAAAAGATTACAGGTAGATTTTTAATTATATAGTTA  
GGATCGGCGACTTGGAACAGTTGAAACGAAGTATACTTTTTTCAGACCATGGATACAT  
ATCCAACCTGCCAGCCAATCTTTGCTAGTCCAAATTGCACAAATAATAGCAGCTCGT  
GTTACACTGTTGTTTCAGCGGGTTCACGATAAATACCGCTATAACAGTGCAAAAAGTC  
ATAACTTTGAGAAGATTCAAGTAATAATAGCTGAGGATATCTACATATAAATAGGA

GGATTTTCATATTATGAAACTTTTCGCAAATAATAGAATACCGGCCAGATCTTTACCGC  
ATCTTTTAGAATACAAAGTAATACTATATCTAATTTAAGCATT\*TTATTCCCATTTT  
TGTCTGATTTTTCTGGGTTTCATCCTCAGGTTTTTAAAATTTAAACCACGTATGATCTCGT  
CGATAATTCCGTA CTCTCGGGCTTCTGCCGCGGACATATAACGCACTCTTCTTCTATATC  
TCTTATAAATTCAGGAGGTTGCCCGTTTTTTCCGTAAAAATATCTTGTAGAGATCCACATA  
TCTGCAATTTTATGTTTGCATCAACTTCATATTCTGAGGGTGGAAAGACGCGGATCCAATTTA  
ATGTTCCGGTCGAGAAAGCAGGAACGAACAGTTAGGGAATGCTAAACGTGTCCTTCCCCCA  
AGCAAGGCATAGATTCCCGGTCTCCAACCTGCCCGCAGCCTATTGTCTCTATGTTTATGT  
CTGACCCCTCATTTCATGAAATTACAAAGAGTCCTTGAAGCAAGTAGGCTTCTTTAGAGCA  
GTTTATAAGAACGCTTGCCGTTTCCGTCGCATCACCATAAATATCAAGGCATATTATCAATT  
TTATAATTTTATTAGCGACCTCCATAGTGAGATTTTCCCATAGAAATATAATACCGTTCTTAT  
AAAGAAAAGAATATAAATCAATAAAATTTACTACTTCTTCATAATATATTTTTTTTTCATAAATT  
ATTTCTGCCTCATCCTCATCCTCATCCCATTTTACTGTGATTAGGTTCAATTTCAATTCTT  
TCTAACTCTTCAACTTCTTCTATTTCTATATAAGGAACTTLAGGGATAATTATTTTAGGCTCTT  
TAGGCTCTTTTTCTCCTTCTTCTTCTTACCCTTTTATCCTTTTCATCCCCTTCATCGTC  
AAAAGGATCGTCAAAAGGATCTGCGTTTATGTAATTTTCGATAAAAAATCAT\*TTCTTTTGG  
TGTTGTAGTTTGTGTTTTATTTAGGTGTTTTACCTTGGCAAGTCCCCCTTTTTACCTT  
GGTAAGTTCCCCTTAAAGTCTTCTATTAAAAACTTATATTTTCAATTAAGGACATC  
CAATATTTCAATATAACCATATTTTATTTTATACTTTGTCAAAGAAGCCCGTCCTCA  
CCCGGGCTAGACGCGTACTTATATGGTATGATTGAATTCTAATGATAATCTGGTTAC  
GGAGCGATTACTTTATTTAATCTTTTTATTTGAATATTTTGAATAGTAAAGTTTTCC  
AAAAATGGAAAACGAGCAAGCTTGTAAGGTAGATGACTATTGGAGACATTCCTTTT  
ATTCCTTTATTTATTAATAATATATGGATATATCCATTTTATA

>c37588\_g2\_i1 - includes the other part of accD, plus three tRNA genes

CCCGCAGCTTCCGCCTTGACAGGGAGGTGCTCTGACCAATTGAACTCCAATCCCAGG  
GAGGCATATATTATGTTTGTCTCAGTTTATAATCTTATGGTATATGGTATATCGGTGA  
ATTATTGAGCCGAGCTGGATTTGAACCAGCGTAGACATATTGCCAACGAATTTACAG  
TCCGTCCCCATTAACCACTCGGGCATCGACCCGGTAAGAATAATTTTAATTTTTAGA  
TTTATTGGTAATCACTGATAAACTCCTTTATTAGTACTCTACCCCCAGGGGAAATT  
GAATCCCCGCTGCCTCCTTGAAAGAGAGATGTCCTGAACCACTAGACGATAGGGGC  
ACACACTTGCCCGGCTGCTACTTACATCATACTAAGATCATAGTATAAACTTCTTTTT  
GTAACACAAAATATAAAGATATAAAAAAGGGTAATGATAATAAAGTTAAAGGAAC  
AATAACCTCTTATCAATTCTATATCTATAAGTATAAGAACAAGAGGTTATATAAATA  
TTATATAAATATATAAATTAATTTAACAAAACAGTCTATTTCAATTTTCATTGACTTTA  
TTTAATAATTGAATACAATTTATCAA\*TTAAGCAAAAGCAAGCCGGTAATTGTGAAAGA  
GATATAGCAAAGACAGAATTCTTTTAAAATACTTACGTGAAAGGATTAGATCGAAGGCGCC  
CTTTTGGAAATAAATATTCGGTCTCTTGGGCACCCCTCAGGGACTTCTATATGCAATGTTTCTT  
CAATTACTCTTCTGCCCGCAAATGCAATGACGGCCCCGGGTTTCGAAATAATTACATTCCC  
CAACATACCAAAACTAGCTGTCACCCACCAGTCGTAGGAGATGTAAGGATTGATACATAA  
AATAGTTTTTATCTAATTTATAAGTATATAATGCACAAGCTATTTTACTCATTTGCATCAAGC  
TCAAACCTCCTTCTGCATACGCGCACCCCCAGAAGCACATATTATAACAAGGGGTAGAAA  
TTCTTTGATAGCATACTCGATCAAACGGGTAATTTTTTCTCCAACTACGGACCCCATAGTAC  
CCGCTATAAACTTAAAATCCATAACCCCAAGTGCTACCGGAATACCCTTTATTTAGCTATG  
CCTGTTTGAATAGCATCATTTAAGCCTGTCTCGCTTTGATAATAATTGAGGCGCTCTTCATA  
GGTCTTATCCTTTCTTCTTCTTCTTCTGATCAAGATGCTCTTGT
